# Supplementary material for: Hydrogen bonded and ionically crosslinked high strength hydrogels exhibiting Ca2+-triggered shape memory properties and volume shrinkage for cell detachment
Source: Royal Society of Chemistry journal article supplement (doi:10.1039/c5tb00781j), 2015-01-01
Supplement: c5tb00781j1.pdf [file c5tb00781j1.pdf]

## Electronic supplementary information (ESI)

### Hydrogen-bonded and ionic crosslinked high strength hydrogels exhibiting Ca<sup>2+</sup>-triggered shape memory and volume shrinkage for cell detachment

Zongqing Ren, Yinyu Zhang, Yongmao Li, Bing Xu, Wenguang Liu\*

*School of Materials Science and Engineering, Tianjin Key Laboratory of Composite and*

*Functional Materials, Tianjin University, Tianjin, 300072, China*

\*Corresponding author (E-mail: [wgliu@tju.edu.cn](mailto:wgliu@tju.edu.cn))

#### Calculation of equilibrium swelling ratio (ESR)

The ESRs of hydrogels were calculated in terms of the following formula:

$$ESR = \frac{m_{wet} - m_{dry}}{m_{dry}} \times 100 \%$$

Where  $m_{wet}$  and  $m_{dry}$  represent the wet weight in their respective solutions and dry weight of hydrogel samples, respectively.

**Table S1.** Mechanical properties of PVDT-PEGDA-PBS and PVDT-PEGDA-Ca-100 hydrogels.

| Sample ID   | Tensile Strength<br>(kPa) | Elongation at<br>Break (%) | Young's Modulus<br>(kPa) |
|-------------|---------------------------|----------------------------|--------------------------|
| PVDT-PBS    | 1443.0±342.1              | 413.1±40.5                 | 9641.0±112.1             |
| PVDT-Ca-100 | 1455.0±142.1              | 456.2±43.1                 | 9668.1±21.2              |

**Table S2.** Mechanical properties of PVDT-PAA-10 hydrogels in different media

| Sample ID          | Tensile Strength<br>(kPa) | Elongation at<br>Break (%) | Young's Modulus<br>(kPa) |
|--------------------|---------------------------|----------------------------|--------------------------|
| PVDT-PAA-10-PBS    | 512.0±12.1                | 262.1±7.5                  | 731.3±66.1               |
| PVDT-PAA-10-Ca-50  | 954.1±109.6               | 396.4±50.5                 | 1694.5±37.4              |
| PVDT-PAA-10-Ca-100 | 1214.1±185.4              | 526.5±25.5                 | 1707.7±142.3             |
| PVDT-PAA-10-Ca-500 | 1252.1±139.0              | 521.3±19.9                 | 1733.2±76.1              |

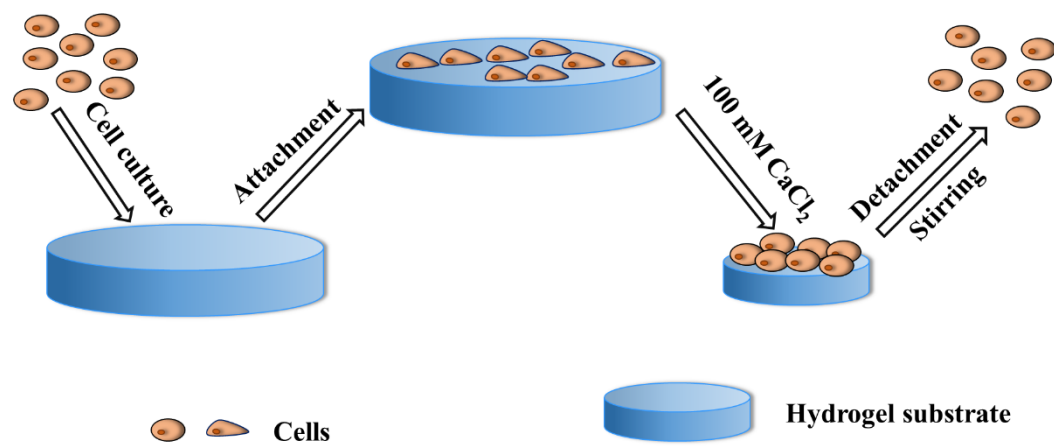

**Scheme S1.** Schematic mechanism of calcium-ion triggered unharmed cell detachment.

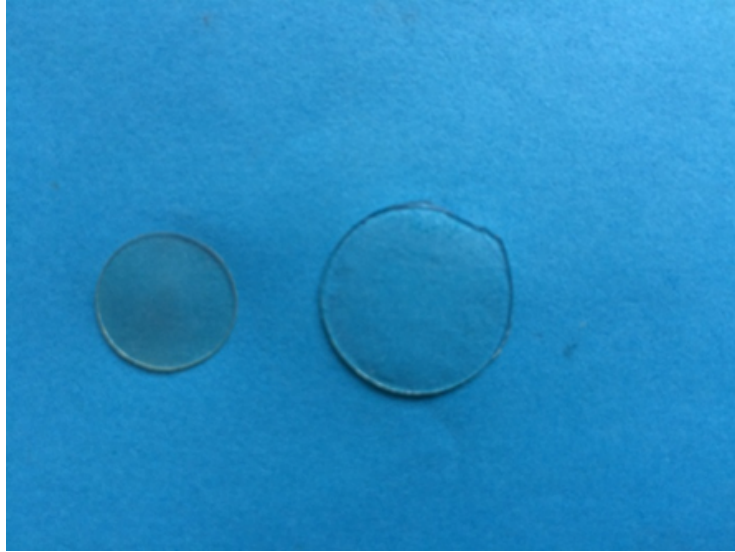

**Fig. S1.** Swelling state of PVDT-PEGDA-PBS hydrogel immersed in neutral PBS (pH = 7.4, left) and acidic PBS (pH = 3, right)

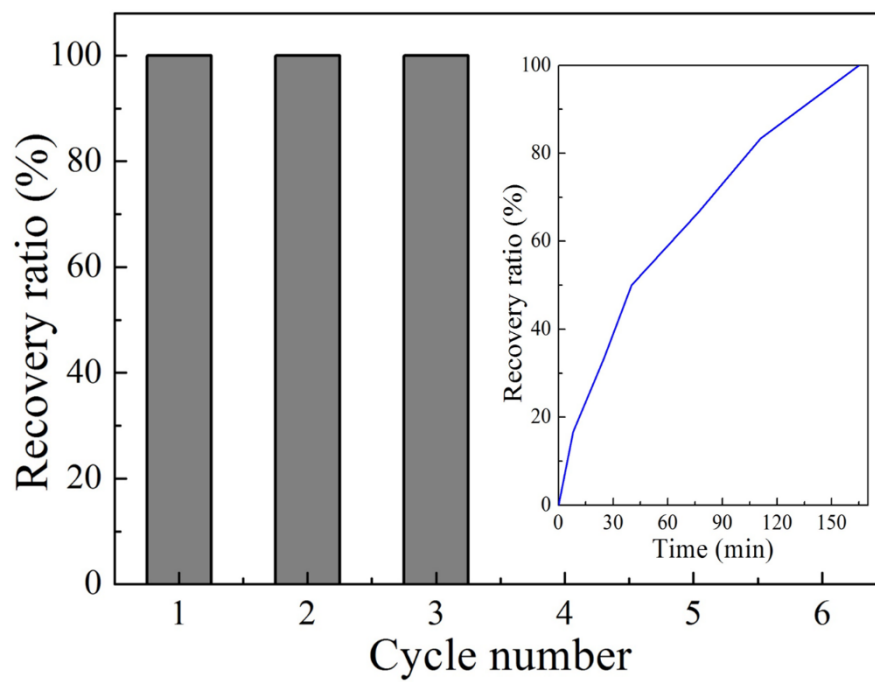

**Fig. S2.** Recovery ratio in three cycles at 37 °C in shape memory quantitative assay.

The inset is the magnification of first cycle.

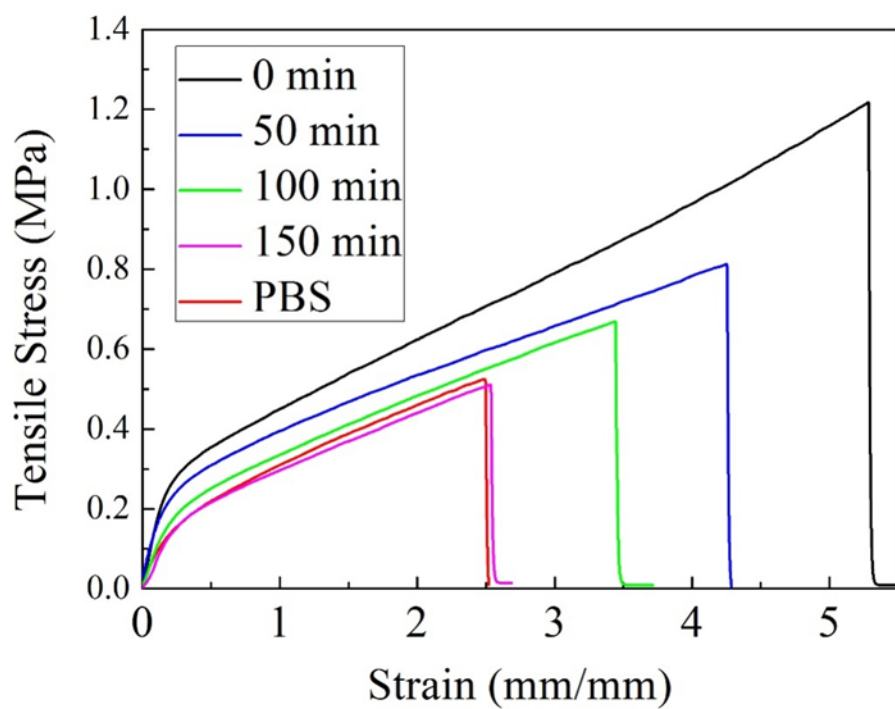

**Fig. S3.** Stress-strain curves of PVDT-PAA-10-Ca-100 hydrogels immersed in 50mmol L<sup>-1</sup> EDTA·2Na solution for different times.

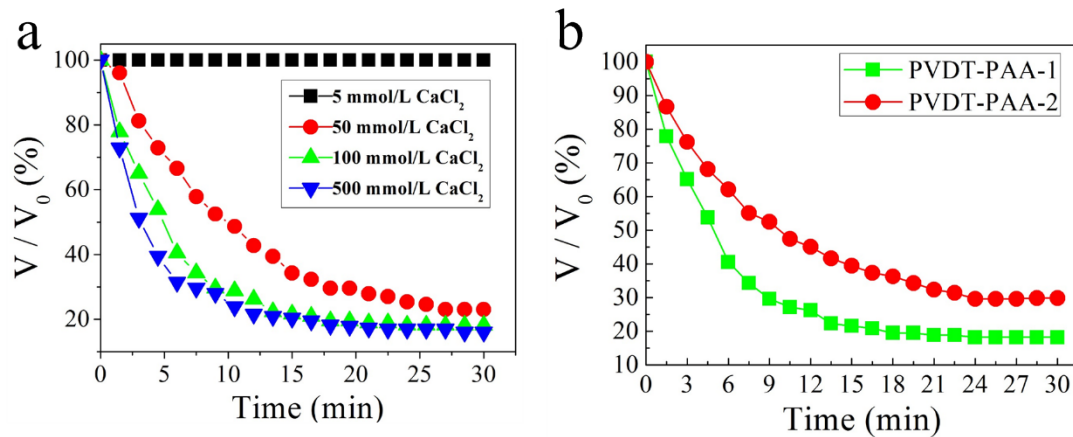

**Fig. S4.** (a) Volume change speed of PVDT-PAA-1-PBS hydrogels in different concentrations of calcium chloride solutions. (b) The volume change speed of PVDT-PAA-1-PBS and PVDT-PAA-2-PBS hydrogels in 100 mmol L<sup>-1</sup> calcium ion solution.



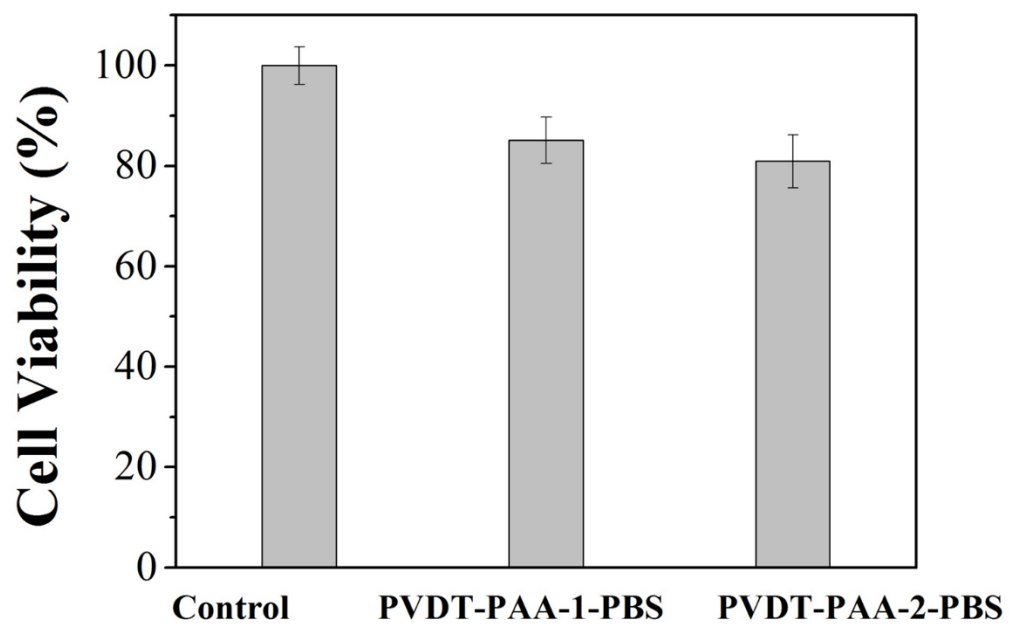

**Fig. S5.** Viability of L929 cells on PVDT-PAA-1-PBS and PVDT-PAA-2-PBS hydrogels.

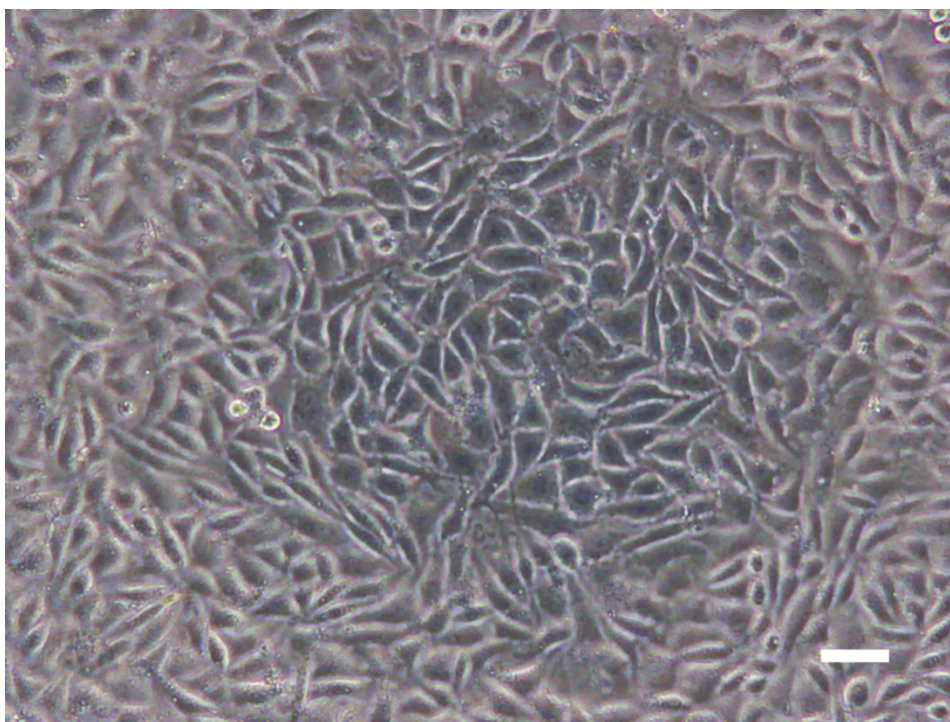

**Fig. S6.** Phase contrast microscopy image of the re-cultured L929 cells detached from PVDT-PAA-1-PBS hydrogel substrate. (Scale bar: 100  $\mu\text{m}$ )
